# Supplementary material for: Frontline knowledge, attitudes, and practices on climate change and its link to zoonotic diseases: a mixed-methods study of healthcare workers in Ada East, Ghana
Source: Research Square preprint supplement (doi:10.21203/rs.3.rs-8282544/v1), 2025-12-22
Supplement: Supplementary file 1 [file 8561bb3ad36f36c12a812a8f.docx]

**Supplementary Table 1:** Knowledge of climate change and its health impacts among frontline healthcare workers (N = 250). Bolded frequencies and percentages indicate good knowledge of climate change and health. Knowledge scores were computed from 37 binary-coded items across three domains: (A) General Climate Change Knowledge includes 16 items assessing understanding of climate change drivers, impacts, and mitigation behaviors. (B) Climate Change & Health Knowledge comprises 12 items evaluating awareness of health-related consequences of climate change, such as disease vulnerability and affected populations. (C) Climate Change & Zoonotic Disease Knowledge contains nine items measuring knowledge of how climate change influences zoonotic disease risks, distribution, and outbreaks. Scores > 60% in each domain (i.e., > 9/16, > 7/12, > 5/9) were categorized as “Good Knowledge.” A total knowledge score > 60% (> 22 out of 37) was categorized as “Good Total Knowledge.”

| **Climate Change and Health Knowledge** | **Frequency**  **(n, %)** | **Mean**  **(SD)** |
| --- | --- | --- |
| **Total Climate Change and Health Knowledge** | **250 (100%)** | **26.46 ± 4.10** |
| Poor Total Knowledge (≤ 60%) (0 – 22 scores) | 42 (16.8%) | 19.59 ± 2.14 |
| Good Total Knowledge (> 60%) (23 – 37 scores) | 208 (83.2%) | 27.85 ± 2.80 |
| Missing | 0 (0%) |  |
| **A. General Climate Change** | **250 (100%)** | **12.81 ± 2.38** |
| Poor Climate Change Knowledge (≤ 60%) (0 – 9 scores) | 24 (9.6%) | 8.00 ± 0.93 |
| Good Climate Change Knowledge (> 60%) (10 – 16 scores) | 226 (90.4%) | 13.32 ± 1.86 |
| **B. Climate Change and Health** | **250 (100%)** | **5.55 ± 1.62** |
| Poor Climate Change and Health Knowledge (≤ 60%) (0 – 7 scores) | 22 (8.8%) | 5.21 ± 1.23 |
| Good Climate Change and Health Knowledge (> 60%) (8 – 12 scores) | 228 (91.2%) | 9.00 ± 1.02 |
| **C. Climate Change and Zoonotic Disease** | **250 (100%)** | **8.10 ± 1.28** |
| Poor Climate Change and Zoonotic Disease Knowledge (≤ 60%) (0 – 5 scores) | 12 (4.8%) | 4.42 ± 0.98 |
| Good Climate Change and Zoonotic Disease Knowledge (> 60%) (6 – 9 scores) | 238 (95.2%) | 8.29 ± 0.98 |
| 1. **General Climate Change Knowledge** | **True**  **(n, %)** | **False**  **(n, %)** |
| **Climate change:** |  |  |
| Affects weather patterns globally | **238 (95.2%)** | 12 (4.8%) |
| Leads to more frequent hurricanes and storms | **210 (84.0%)** | 40 (16.0%) |
| Contributes to increased droughts and flooding | **235 (94.0%)** | 15 (6.0%) |
| Only affects some regions of the world | 55 (22.0%) | **195 (78.0%)** |
| Alters temperature and rainfall now and in the future | **223 (89.2%)** | 27 (10.8%) |
| Brings snow to Africa | 29 (11.6%) | **221 (88.4%)** |
| Causes coastal erosion and rising sea levels | **186 (74.4%)** | 64 (25.6%) |
| **The following contributes to climate change:** |  |  |
| Energy use and power generation | **154 (61.6%)** | 96 (38.4%) |
| Agricultural production | **140 (56.0%)** | 110 (44.0%) |
| Industrial and factory activities | **227 (90.8%)** | 23 (9.2%) |
| Atmospheric pollution (e.g., burning garbage) | **241 (96.4%)** | 9 (3.6%) |
| Traffic and motor vehicles | **170 (68.0%)** | 80 (32.0%) |
| Deforestation (e.g., cutting down trees) | **240 (96.0%)** | 10 (4.0%) |
| Carbon dioxide emissions | **215 (86.0%)** | 35 (14.0%) |
| Methane from livestock | **102 (40.8%)** | 148 (59.2%) |
| Inadequate medical waste disposal (e.g., poorly incinerating face masks) | **206 (82.4%)** | 44 (17.6%) |
| 1. **Climate Change and Health Knowledge** |  |  |
| Allergic reactions can be exacerbated by climate change | **200 (80.0%)** | 50 (20.0%) |
| Mental health conditions can be affected by climate change | **70 (28.0%)** | 180 (72.0%) |
| Social conflicts can arise as a result of climate change | **65 (26.0%)** | 185 (74.0%) |
| **The following are the health impacts of climate change:** |  |  |
| Air quality–related illnesses | **236 (94.4%)** | 14 (5.6%) |
| Heat-related illnesses | **229 (91.6%)** | 21 (8.4%) |
| Cold-related illnesses | 226 (90.4%) | **24 (9.6%)** |
| Malnutrition | **137 (54.8%)** | 113 (45.2%) |
| **The following populations are affected by climate change:** |  |  |
| Children | **116 (46.4%)** | 134 (53.6%) |
| All age groups | **154 (61.6%)** | 96 (38.4%) |
| Elderly | **111 (44.4%)** | 139 (55.6%) |
| Women | **29 (11.6%)** | 221 (88.4%) |
| Men | **16 (6.4%)** | 234 (93.6%) |
| 1. **Climate Change and Zoonotic Disease Knowledge** |  |  |
| Climate change increases the risk of illness in humans, livestock, and poultry | **247 (98.8%)** | 3 (1.2%) |
| Infectious disease outbreaks will be worsened by climate change | **241 (96.4%)** | 9 (3.6%) |
| Climate change is expected to alter the incidence, prevalence, and distribution of infectious diseases in Africa and globally | **239 (95.6%)** | 11 (4.4%) |
| The risk of Ebola virus disease. outbreaks will increase because of climate change | **204 (81.6%)** | 46 (18.4%) |
| Warmer temperatures and changing rainfall patterns may expand breeding habitats for certain zoonotic diseases, like Ebola virus disease. | **233 (93.2%)** | 17 (6.8%) |
| Climate change can cause Ebola virus disease. to emerge in new locations | **208 (83.2%)** | 42 (16.8%) |
| **The following are the health impacts of climate change:** |  |  |
| Vector-borne diseases | **207 (82.8%)** | 43 (17.2%) |
| Water-borne diseases | **229 (91.6%)** | 21 (8.4%) |
| Zoonotic disease outbreaks | **217 (86.8%)** | 33 (13.2%) |

**Supplementary table 2:** Attitudes toward climate change and its health impacts among frontline healthcare workers (N = 250). Bolded frequencies and percentages indicate good attitudes regarding climate change and health. Seven items were recoded into binary indicators of agreement with pro-environmental and pro-health statements. A total score > 60% (≥ 4 out of 7) was categorized as “Good Climate Change Attitudes.” These items reflect mitigation support, responsibility across stakeholders, healthcare's role in climate change, and beliefs about human control over climate-related outcomes.

| **Climate Change and Health Attitudes** | **Frequency**  **(n, %)** | **Mean**  **(SD)** |
| --- | --- | --- |
| **Overall Climate Change and Health Attitudes** | **250 (100%)** | **5.32 ± 1.49** |
| Poor Attitudes (≤ 60%) (0 – 4 scores) | 33 (13.2%) | 2.79 ± 0.48 |
| Good Attitudes (> 60%) (5 – 7 scores) | 217 (86.8%) | 5.70 ± 1.19 |
| **Attitudes Related to Climate Change and Its Health Impacts** | **Agree**  **(n, %)** | **Disagree**  **(n, %)** |
| Climate change mitigation is important to tackle both the spread and re-emergence of zoonotic diseases | **236 (94.4%)** | 14 (5.6%) |
| The Ministry of Health is responsible for reducing the health impact of climate change | **212 (84.8%)** | 38 (15.2%) |
| Private citizens are responsible for reducing the health impact of climate change | **199 (79.6%)** | 51 (20.4%) |
| Industrialized countries are responsible for reducing the health impact of climate change | **144 (57.6%)** | 106 (42.4%) |
| Donors and NGOs are responsible for reducing the health impact of climate change | **149 (59.6%)** | 101 (40.4%) |
| Health care systems contribute to climate change | **183 (72.8%)** | 68 (27.2%) |
| There is nothing we can do about climate change because it is an act of God | 43 (17.2%) | **207 (82.8%)** |

**Supplementary table 3:** Climate change mitigation practices among frontline healthcare workers (N = 250).Bolded frequencies and percentages indicate good climate change mitigation practices. Thirteen items were recoded to reflect good practices across two domains: (A) Individual-Level Practices (8 items; score > 4 = "Good Individual Practices") such as energy saving, water conservation, waste sorting, and transportation, and (B) Institutional-Level Practices (5 items; score > 3 = "Good Institutional Practices") such as reducing single-use plastics, sustainability in equipment use, and facility-based training. An overall practice score > 60% (> 7 out of 13) was categorized as “Good Climate Change Practices.”

| **Level of Climate Change Practices** | **Frequency**  **(n, %)** | **Mean**  **(SD)** |
| --- | --- | --- |
| **Overall Climate Change Practices** | **250 (100%)** | **8.13 ± 2.11** |
| Poor Practices (≤ 60%) (0 – 7 scores) | 94 (37.6%) | 5.90 ± 1.26 |
| Good Practices (> 60%) (8 – 13 scores) | 156 (62.4%) | 9.47 ± 1.17 |
| Missing | 0 (0%) |  |
| **A. Individual-Level Climate Change Mitigation Practices** | **250 (100%)** | **5.80 ± 1.52** |
| Poor Individual Practices (≤ 60%) (0 – 4 scores) | 51 (20.4%) | 3.47 ± 0.70 |
| Good Individual Practices (> 60%) (5 – 8 scores) | 199 (79.6%) | 6.39 ± 1.02 |
| Missing | 0 (0%) |  |
| **B. Institutional-Level Climate Change Mitigation Practices** | **250 (100%)** | **2.33 ± 1.11** |
| Poor Institutional Practices (≤ 60%) (0 – 3 scores) | 222 (88.8%) | 2.11 ± 0.97 |
| Good Institutional Practices (> 60%) (4 – 5 scores) | 28 (11.2%) | 4.11 ± 0.31 |
| Missing | 0 (0%) |  |
| **Individual-Level Climate Change Practices** | **Yes**  **(n, %)** | **No**  **(n, %)** |
| Turn off electric lights and appliances (e.g., lights, fans, TVs) when leaving a room or when they are not in use | **230 (92.0%)** | 20 (8.0%) |
| Use low-energy appliances | **205 (82.0%)** | 45 (18.0%) |
| Use fluorescent, energy-saving light bulbs | **213 (85.2%)** | 37 (14.8%) |
| Take steps to conserve water at home (e.g., using a bucket instead of running water, fixing leaking taps) | **191 (76.4%)** | 59 (23.6%) |
| Harvest rainwater | **125 (50.0%)** | 125 (50.0%) |
| Sort waste into different categories and dispose of it in designated areas (e.g., recycling, compost, etc.) | **114 (45.6%)** | 136 (54.4%) |
| Use environmentally friendly cooking fuels or stoves (e.g., improved cookstoves or gas) | **223 (89.2%)** | 27 (10.8%) |
| Choose lower-impact transportation options (e.g., walking, biking, or public transport) over a private car or motorcycle | **148 (59.2%)** | 102 (40.8%) |
| **Institutional-Level Climate Change Practices** |  |  |
| Turn off medical equipment, lights, or air conditioning units when not in use at your health facility | **154 (61.6%)** | 96 (38.4%) |
| Ensure computers and other digital equipment are turned off or put in sleep mode when not in use at your health facility | **161 (64.4%)** | 89 (35.6%) |
| Minimize the use of single-use plastics, switching to more sustainable or reusable tools where possible | **38 (15.2%)** | 212 (84.8%) |
| Climate change mitigation/environmental management topics are included in monthly staff meetings or trainings at my health facility | **11 (4.4%)** | 239 (95.6%) |
| Consider environmental sustainability when using/purchasing medical equipment, resources, and handling medical waste | **219 (87.6%)** | 31 (12.4%) |

**Supplementary Table 4:** Predictors of good climate change attitudes among frontline healthcare workers (N = 250). Logistic regression was presented as crude odds ratios (ORs) with 95% confidence intervals (95% CI).

|  |  | **Knowledge good vs poor** | | **Attitude good vs poor** | | **Attitude positive vs negative** | |
| --- | --- | --- | --- | --- | --- | --- | --- |
| **Predictor** | **Level** | **OR** | **95% CI** | **OR** | **95% CI** | **OR** | **95% CI** |
| **Sociodemographic Characteristics** | | | | | | | |
| Age (in years) | 20-29 | 1.00 |  | 1.00 |  | 1.00 |  |
| 30-34 | 0.68 | 0.29-1.58 | 0.99 | 0.40-2.44 | 1.14 | 0.61-2.12 |
| 35-57 | 0.63 | 0.27-1.44 | 0.99 | 0.40-2.44 | 1.48 | 0.79-2.80 |
| Gender | Male | 1.00 |  | 1.00 |  | 1.00 |  |
| Woman | 1.11 | 0.52-2.28 | 0.57 | 0.20-1.36 | 0.90 | 0.50-1.60 |
| **Professional Characteristics** | | | | | | | |
| Healthcare Facility Type | CHPS Compound | 1.00 |  | 1.00 |  | 1.00 |  |
| District/Regional Hospital | 0.45 | 0.07-1.72 | 0.54 | 0.08-2.10 | 0.32 | 0.10-0.86 |
| Health Center | 0.49 | 0.07-1.88 | 0.76 | 0.11-3.05 | 0.70 | 0.22-1.95 |
| Occupational Category | Nurse | 1.00 |  | 1.00 |  | 1.00 |  |
| Midwives | 0.90 | 0.40-2.17 | 0.66 | 0.27-1.70 | 0.79 | 0.40-1.57 |
| Other Clinical Staff | 2.07 | 0.75-7.33 | 1.31 | 0.46-4.73 | 1.00 | 0.49-2.08 |
| Experience in Current Role | > 5 years | 1.00 |  | 1.00 |  | 1.00 |  |
| ≤ 5 years | 1.65 | 0.84-3.22 | 0.81 | 0.36-1.72 | 0.91 | 0.53-1.54 |
| Diagnoses/Treats Patients w/ IDs | Yes | 1.00 |  | 1.00 |  | 1.00 |  |
| No | 1.00 | 0.50-2.04 | 0.75 | 0.36-1.61 | 0.86 | 0.50-1.47 |
| **Training Characteristics** | | | | | | | |
| Received ID Training | Yes | 1.00 |  | 1.00 |  | 1.00 |  |
| No | 1.23 | 0.60-2.70 | 0.70 | 0.33-1.56 | 0.89 | 0.51-1.57 |
| Experts Who Delivered ID Training | No - Respondents’ Health Facility | 1.00 |  | 1.00 |  | 1.00 |  |
| Yes - Respondents’ Health Facility | 0.40 | 0.20-0.80 | 0.48 | 0.22-1.03 | 0.74 | 0.44-1.23 |
| No - Ministry/Government Health Authorities | 1.00 |  | 1.00 |  | 1.00 |  |
| Yes - Ministry/Government Health Authorities | 1.52 | 0.77-3.14 | 3.00 | 1.31-7.77 | 0.94 | 0.56-1.58 |
| No - International NGOs | 1.00 |  | 1.00 |  | 1.00 |  |
| Yes - International NGOs | 1.18 | 0.42-4.20 | 2.02 | 0.56-12.93 | 2.28 | 0.94-6.42 |
| What ID Training Was Delivered | No - COVID-19 | 1.00 |  | 1.00 |  | 1.00 |  |
| Yes - COVID-19 | 0.47 | 0.21-0.95 | 0.82 | 0.37-1.73 | 1.33 | 0.79-2.23 |
| No - Ebola virus disease (EVD) | 1.00 |  | 1.00 |  | 1.00 |  |
| Yes - Ebola virus disease (EVD) | 0.49 | 0.24-1.00 | 0.76 | 0.35-1.77 | 1.45 | 0.80-2.70 |
| No - Human monkeypox virus | 1.00 |  | 1.00 |  | 1.00 |  |
| Yes - Human monkeypox virus | 0.30 | 0.15-0.60 | 0.60 | 0.28-1.31 | 0.71 | 0.41-1.25 |
| No - Rabies | 1.00 |  | 1.00 |  | 1.00 |  |
| Yes - Rabies | 0.41 | 0.21-0.82 | 0.78 | 0.36-1.76 | 0.79 | 0.45-1.38 |
| **Information Access Characteristics** | | | | | | | |
| Current Source of Zoonotic Disease Information | No - Conventional media | 1.00 |  | 1.00 |  | 1.00 |  |
| Yes - Conventional media | 2.57 | 1.32-5.11 | 1.43 | 0.68-2.99 | 1.46 | 0.86-2.47 |
| No - Public media | 1.00 |  | 1.00 |  | 1.00 |  |
| Yes - Public Media | 2.17 | 1.04-4.86 | 1.24 | 0.58-2.77 | 1.48 | 0.87-2.56 |
| Current Source of Climate Change Information | No - Conventional media | 1.00 |  | 1.00 |  | 1.00 |  |
| Yes - Conventional media | 3.46 | 1.76-6.96 | 2.97 | 1.42-6.39 | 1.60 | 0.94-2.72 |
| No - Public media | 1.00 |  | 1.00 |  | 1.00 |  |
| Yes - Public Media | 2.88 | 1.29-7.35 | 1.38 | 0.63-3.28 | 1.39 | 0.80-2.44 |
| Frequency of Climate Change Information | Always or Often | 1.00 |  | 1.00 |  | 1.00 |  |
| Sometimes, Rarely, or Never | 0.62 | 0.14-1.89 | 0.52 | 0.08-1.87 | 0.58 | 0.22-1.38 |

**Supplementary Table 5.** Primary themes and sub-themes from the focus group discussion on frontline health workers’ perspectives of climate change and zoonotic disease

| **Themes** | **Sub-themes** |
| --- | --- |
| Understanding of Climate Change in the Local Context | - Lived experiences with shifting weather patterns - Regional variation in climate perceptions - Increased illness linked to seasonal changes - Vector-borne diseases associated with rainfall |
| Perceived Link Between Climate Change and Zoonotic Disease | - Environmental changes drive animal-human proximity - Cultural practices and urban living as transmission risks |
| Observations of Community Beliefs and Delays in Zoonotic Disease Care | - Spiritual, herbal, or self-treatment before formal care - Family and media influence care-seeking pathways - Livestock underreporting due to economic concerns |
| Institutional Gaps in Preparedness for Climate-driven Zoonotic Threats | - Reactive, under-resourced outbreak response - Limited institutional protocols and training - Reliance on informal information sources |
| Call for Action to Address Climate-Zoonosis Challenges | - Multisectoral collaboration and stakeholder roles - Infrastructure, diagnostic, and supply investment - Desire for policy implementation follow-through |

### **Notes.** This table summarizes the main themes and sub-themes identified during the focus group discussion with frontline healthcare workers in Ada East District, Ghana. Themes reflect providers’ understanding of local climate changes, perceived health and zoonotic impacts, community beliefs and behaviors influencing care-seeking, institutional gaps in preparedness, and calls for multisectoral action to strengthen climate–health resilience.
